# Supplementary material
Source: PubMed Central journal article supplement (PMC2924603)

**Supplemental Figure 1.** Differentiation of the three NK cell subsets according to surface expression of CD25 and CD69. Analysis of the activation state of the three NK cell subsets demonstrated no change in the MFI of either CD25<sup>+</sup> or CD69<sup>+</sup> immature (R1), double positive (R2), and mature (R3) NK cell subsets in response to SiO<sub>2</sub> exposure at 7 days. Values are means ± SEM; n=6 mice.

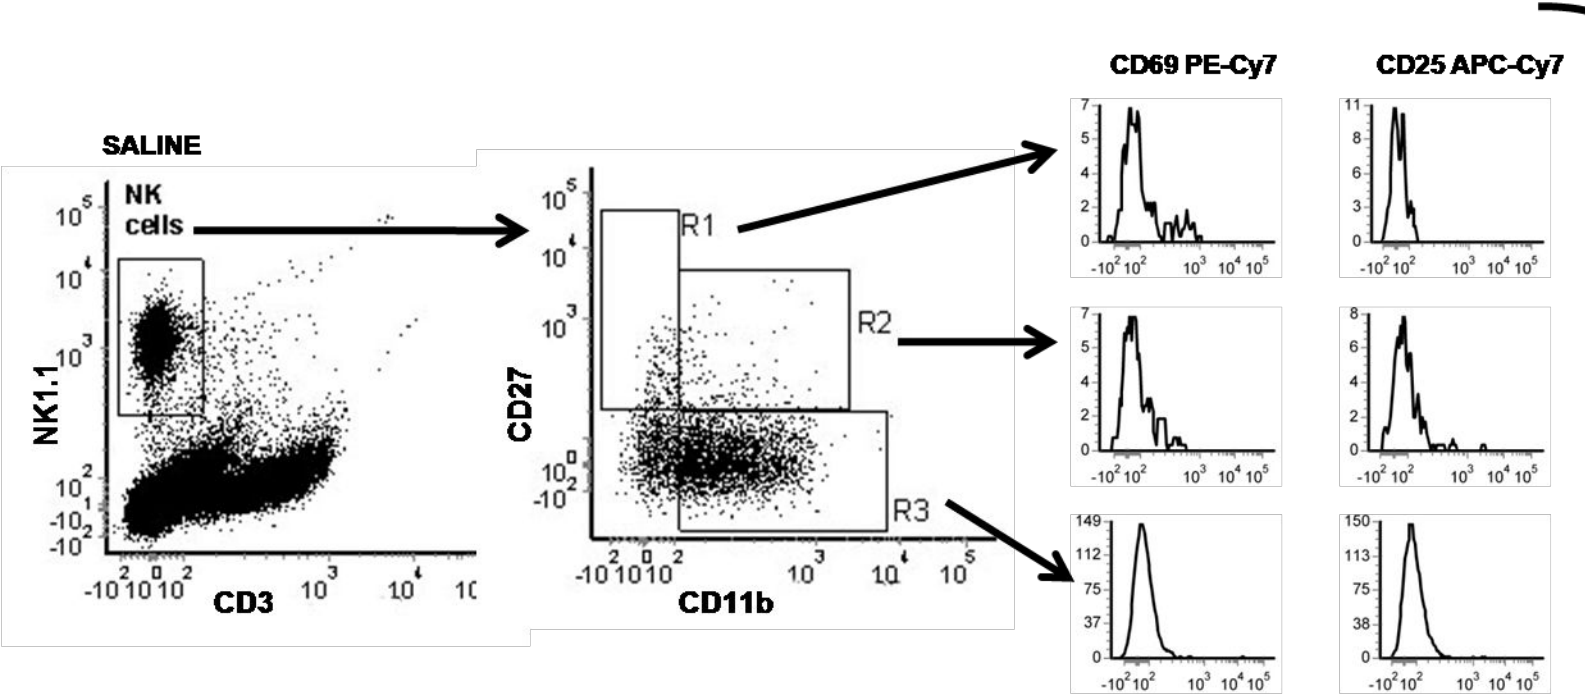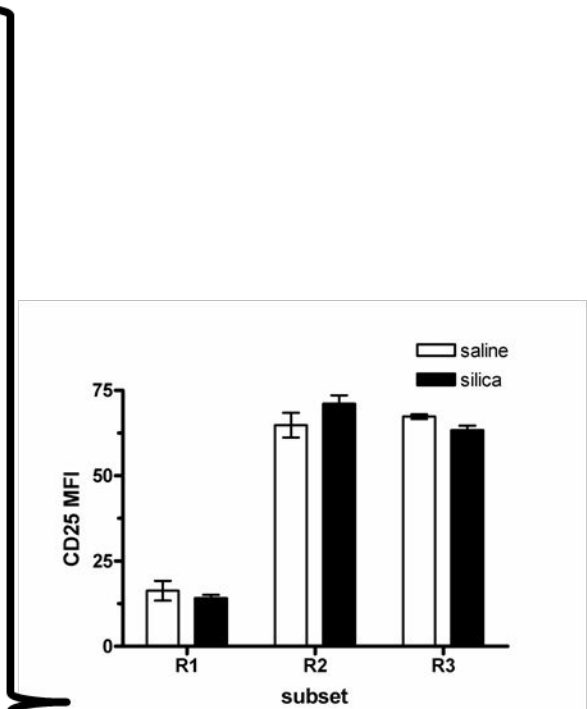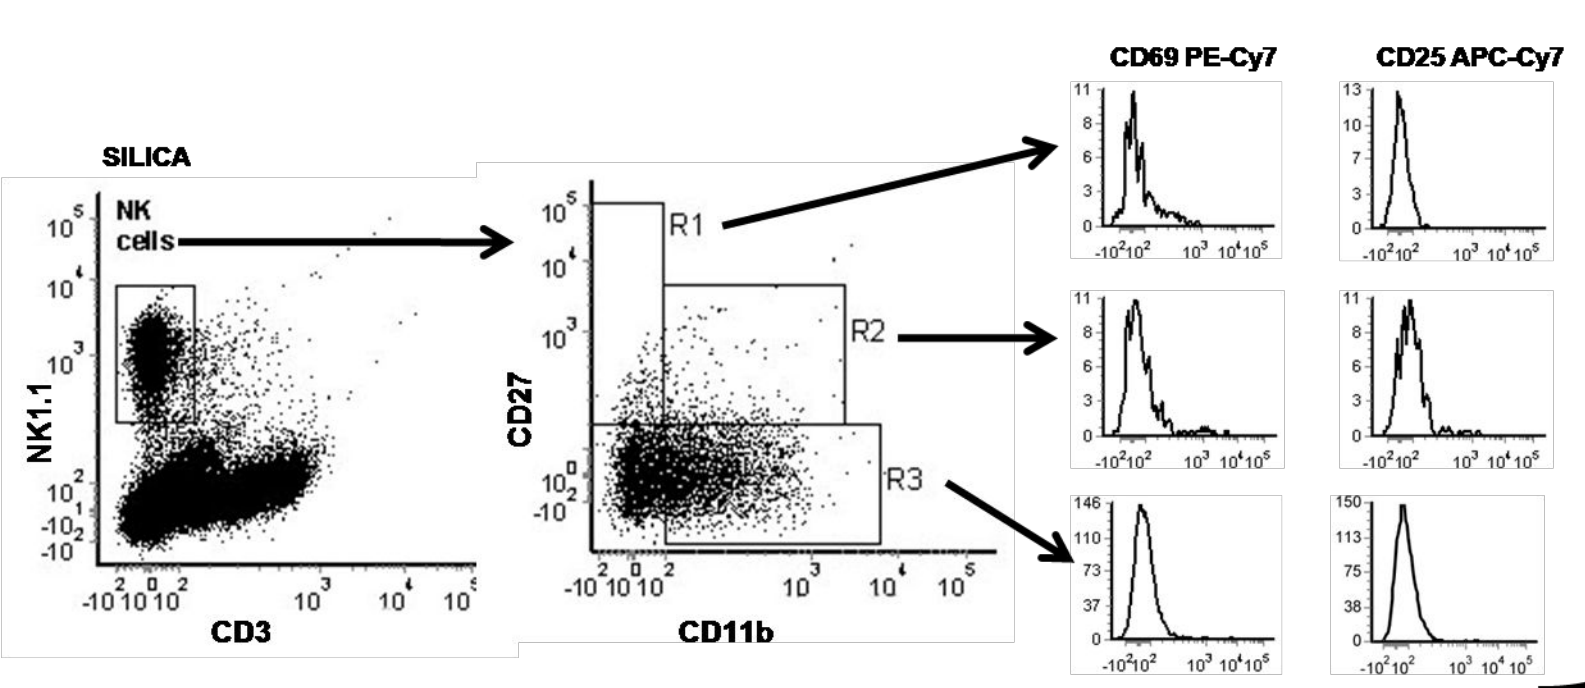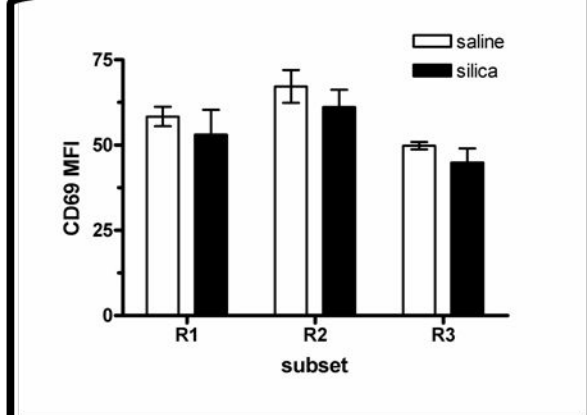

Supplement: jlb.0210108_1.pdf [file jlb.0210108_1.pdf]
